# Supplementary material for: Avoiding the Enumeration of Infeasible Elementary Flux Modes by Including Transcriptional Regulatory Rules in the Enumeration Process Saves Computational Costs
Source: PLOS journal article supplement (doi:10.1371/journal.pone.0129840), 2015-06-19
Supplement: S7 (10.1371/journal.pone.0129840.s007) [file journal.pone.0129840.s007]

Table S5: Pseudocode for the *regEFMtool*. Text sections in *italic* style indicate our modifications compared to the binary method reported by Gagneur and Klamt [5].

### **Pre-processing phase**

Read input files (stoichiometric matrix, reversibility, ...)  
Split each reversible reaction into two irreversible reactions  
*Read file containing gene regulatory information*  
*Parse gene regulation file*  
*LOOP: Iterate through all provided rules*  
    *Create reverse polish notation (RPN) stack for rule*  
    *Add RPN stack to post-processing rule container*  
    *IF rule qualifies for iteration phase THEN*  
        *Create bit pattern for rule*  
        *Add bit pattern to iteration phase rule container*  
    *END IF*  
*END OF LOOP*  
Compute kernel K of stoichiometric matrix  
Use kernel K to initialize mode matrix R  
Sort mode matrix R (put rows with only positive elements to top)  
Convert all rows with only positive elements to binary format

### **Iteration phase**

LOOP1: Iterate through all numerical rows of mode matrix R  
    LOOP2: Iterate through all adjacent positive-negative pairs  
        Create new mode by combining parent modes  
        *LOOP3: Iterate through all iteration phase rules*  
            *IF mode does not obey rule THEN*  
                *Eliminate mode*  
            *LAST LOOP 3*  
            *END IF*  
        *END OF LOOP3*  
    END OF LOOP2  
    Remove all modes with negative values at current row  
    Convert current row to binary format  
END OF LOOP1

### **Post-processing phase**

*LOOP1: Iterate through all modes*  
    *LOOP2: Iterate through all post-processing rules*  
        *IF mode does not obey rule THEN*  
            *Remove mode*  
        *LAST LOOP2*  
        *END IF*  
    *END OF LOOP2*  
*END OF LOOP1*  
Remove futile 2-cycle modes  
Convert binary modes to numerical form  
Write result file
